# Supplementary material for: Electronic and molecular behaviors of a novel ionic paramagnetic ruthenium(iii) complex
Source: Royal Society of Chemistry journal article supplement (doi:10.1039/c3cp52709c), 2013-01-01
Supplement: c3cp52709c.pdf [file c3cp52709c.pdf]

## Supporting information for

### Electronic and Molecular Behaviors of a Novel Ionic Paramagnetic Ruthenium

#### (III) Complex

Qilong Sun, Ying Dai , Yandong Ma, Xiangchao Ma, and Baibiao Huang

School of Physics, State Key Laboratory of Crystal Materials, Shandong University,

Jinan 250100, People's Republic of China

|                                          | Exp.   | Cal. <sup>a</sup> | Cal. <sup>b</sup> |
|------------------------------------------|--------|-------------------|-------------------|
| <b>Ru-Cl<sub>1</sub></b>                 | 2.363  | 2.376             | 2.445             |
| <b>Ru-Cl<sub>2</sub></b>                 | 2.344  | 2.363             | 2.439             |
| <b>Ru-P<sub>1</sub></b>                  | 2.408  | 2.405             | 2.314             |
| <b>Ru-P<sub>2</sub></b>                  | 2.408  | 2.405             | 2.314             |
| <b>Cl<sub>1</sub>-Ru-Cl<sub>2</sub></b>  | 89.634 | 90.225            | 90.026            |
| <b>Cl<sub>1</sub>-Ru-Cl<sub>2a</sub></b> | 90.374 | 89.775            | 89.974            |
| <b>Cl<sub>1</sub>-Ru-P<sub>1</sub></b>   | 90.284 | 89.974            | 90.399            |
| <b>Cl<sub>2</sub>-Ru-P<sub>1</sub></b>   | 90.594 | 90.983            | 90.230            |
| <b>Cl<sub>1</sub>-Ru-P<sub>1a</sub></b>  | 89.724 | 90.026            | 89.601            |
| <b>Cl<sub>2</sub>-Ru-P<sub>1a</sub></b>  | 89.414 | 89.017            | 89.770            |
| <b>P<sub>1</sub>-Ru-P<sub>1a</sub></b>   | 180.0  | 180.0             | 180               |

**Table S1:** Selected bond lengths [ $\text{\AA}$ ] and angles [ $^\circ$ ] for the Ru (III) complex with Ru (II) the optimized geometry values. Cal.<sup>a</sup>: the parameters of the Ru (III) complex, Cal.<sup>b</sup>: the parameters of the Ru (II) complex.

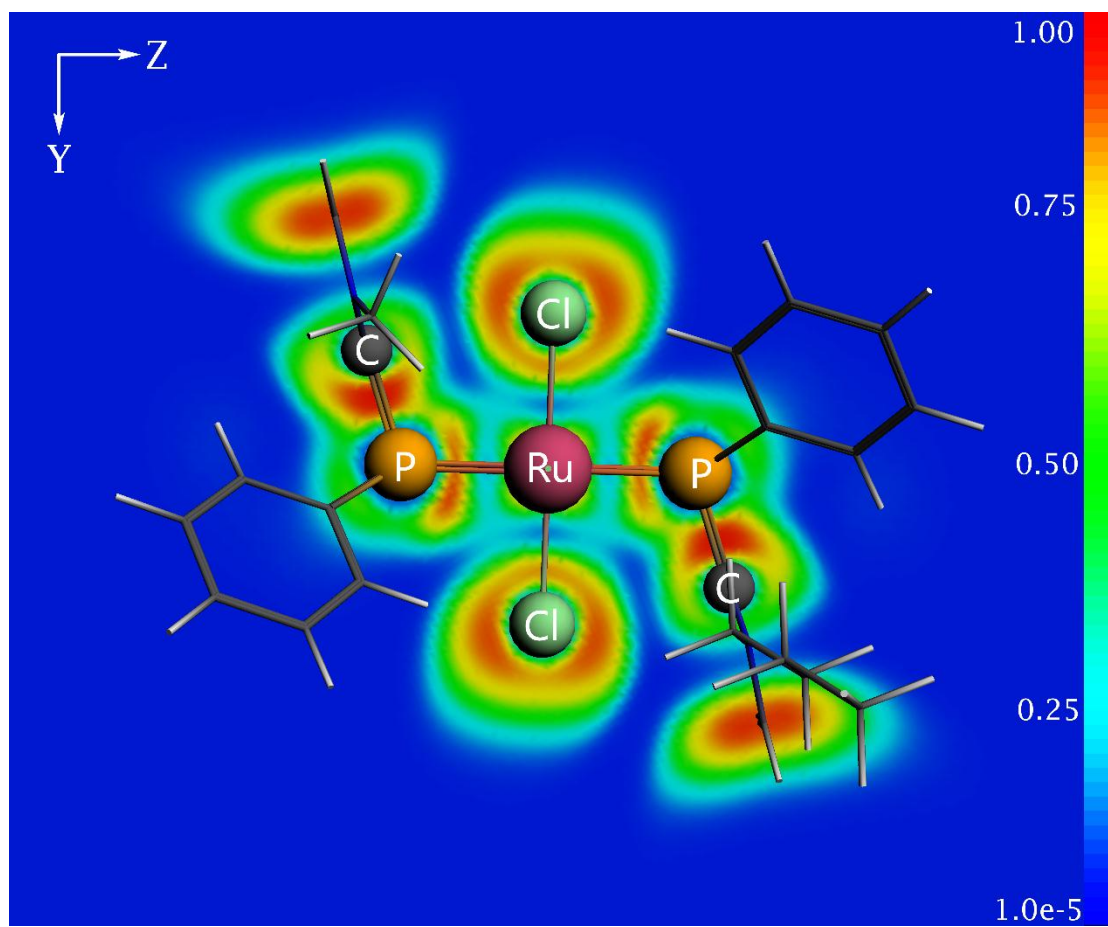

**Figure S1.** Calculated electron localization function plots for Ru (II) complex (Note: isovalue = 0.03)

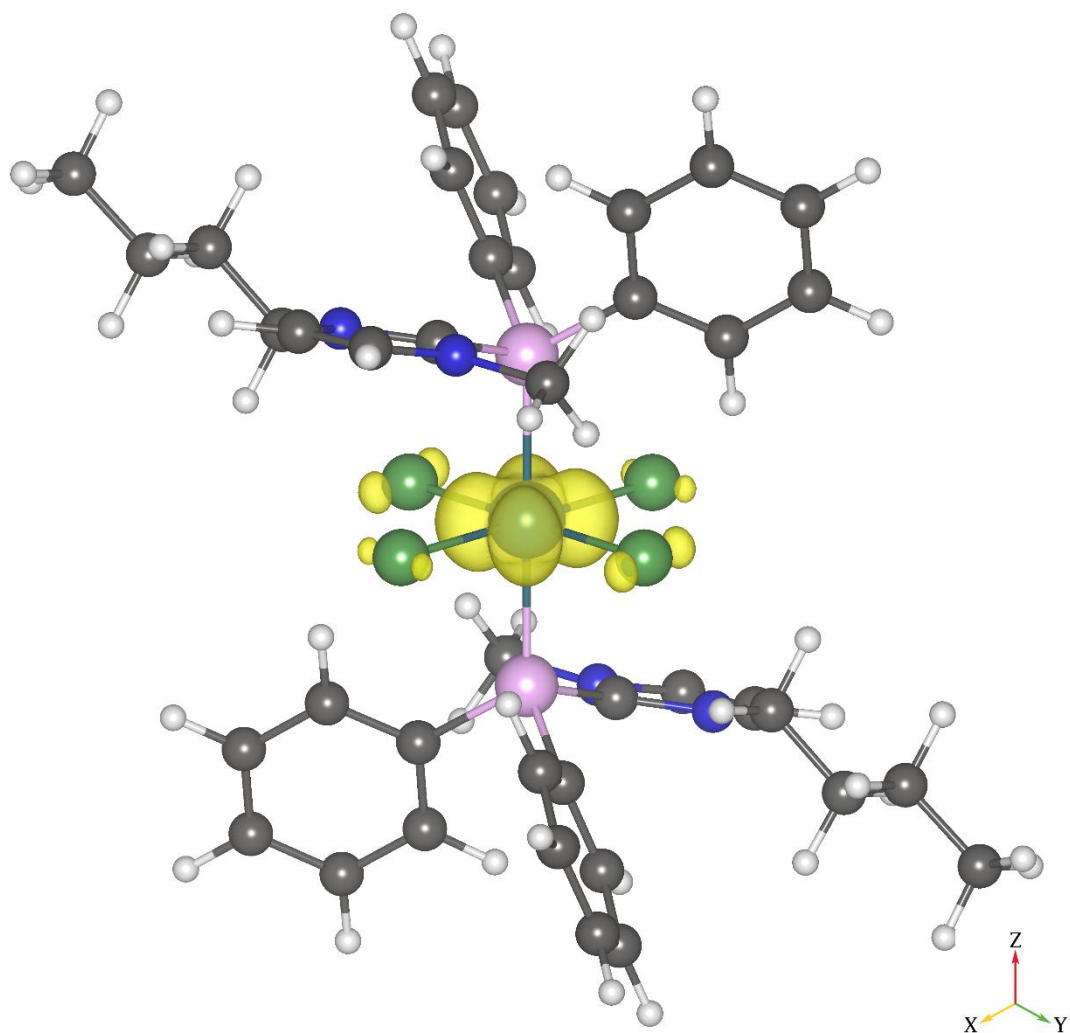

**Figure S2.** The spin-polarized distribution of the Ru (III) complex (Note isosurface level = 0.007)

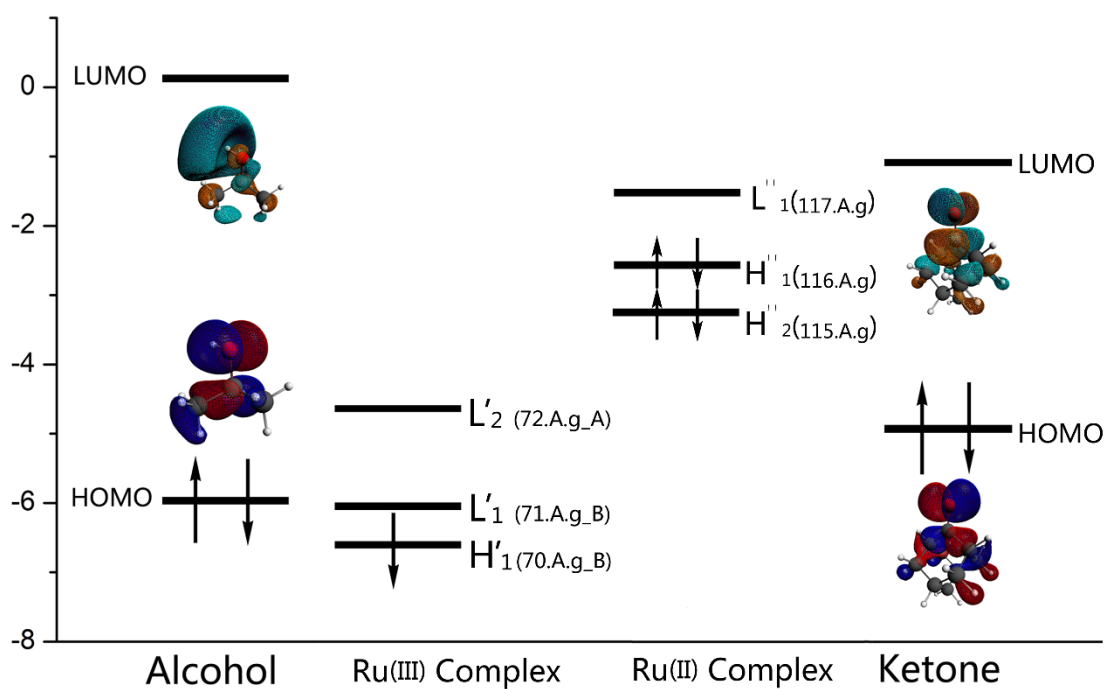

**Figure S3.** The relative position and interaction of the frontier orbitals (FMOs) of the Ru (III) complex, the Ru (II) complex, Ketone (2-adamantanone) and Alcohol (2-propanol).
